# Title: A small-molecule oral agonist of the human glucagon-like peptide-1 receptor

**Authors:** David A. Griffith<sup>1\*</sup>, David J. Edmonds<sup>1</sup>, Jean-Phillipe Fortin<sup>1</sup>, Amit S. Kalgutkar<sup>1</sup>, J. Brent Kuzmiski<sup>2</sup>, Paula M. Loria<sup>3</sup>, Aditi R. Saxena<sup>1</sup>, Scott W. Bagley<sup>3</sup>, Clare Buckeridge<sup>1</sup>, John M. Curto<sup>3</sup>, David R. Derksen<sup>3</sup>, João M. Dias<sup>3</sup>, Matthew C. Griffor<sup>3</sup>, Seungil Han<sup>3</sup>, V. Margaret Jackson<sup>2</sup>, Margaret S. Landis<sup>1</sup>, Daniel J. Lettiere<sup>3</sup>, Chris Limberakis<sup>3</sup>, Yuhang Liu<sup>3</sup>, Alan M. Mathiowetz<sup>1</sup>, David W. Piotrowski<sup>3</sup>, David A. Price<sup>1</sup>, Roger B. Ruggeri<sup>2</sup>, David A. Tess<sup>1</sup>

## Affiliations:

<sup>1</sup>Pfizer Worldwide Research and Development, Cambridge, MA 02139, USA.

<sup>2</sup>Pfizer Worldwide Research and Development, Cambridge, MA 02139, USA, at the time the work was performed.

<sup>3</sup>Pfizer Worldwide Research and Development, Groton, CT 06340, USA.

\*Correspondence to: [david.a.griffith@pfizer.com](mailto:david.a.griffith@pfizer.com)

**ORCID IDs:** DAG, 0000-0002-7592-2478; CL, 0000-0003-2987-680X; SWB, 0000-0002-7365-7332; ARS, 0000-0001-6017-1838; DJE, 0000-0001-9234-8618; RBR, 0000-0001-9813-1882; DJL, 0000-0002-3164-3290; MCG, 0000-0003-4850-5545; JBK, 0000-0002-9240-4867; PML, 0000-0003-4690-5991; VMJ, 0000-0002-0079-3915; JMC, 0000-0001-9033-5952; JPF, 0000-0001-6786-0599; YL, 0000-0001-6844-7480; DWP, 0000-0002-4659-6300

**One Sentence Summary:** PF-06882961 is an orally administered small molecule that activates the GLP-1 receptor to lower blood glucose in humans.

**Abstract:** Peptide agonists of the glucagon-like peptide-1 receptor (GLP-1R) have revolutionized diabetes therapy, but their use has been limited by the requirement for injection. Here we describe the first effective, orally bioavailable small molecule GLP-1R agonists. A sensitized high-throughput screen identified a series of small molecule GLP-1R agonists that were optimized to promote endogenous GLP-1R signaling with nM potency. These small molecule agonists increased insulin levels in primates but not rodents, which is explained by a cryo-EM structure that revealed a binding pocket requiring primate-specific tryptophan 33. Importantly, oral administration of agonist PF-06882961 to healthy humans produced dose-dependent declines in serum glucose (NCT03309241). This opens the door to a new era of oral small molecule therapies that target the well-validated GLP-1R pathway for metabolic health.

37 **Main Text:**

38           Glucagon-like peptide-1 (GLP-1), a neuroendocrine hormone, is derived from a  
39 proglucagon precursor (1) and secreted by intestinal enteroendocrine L cells in response to  
40 nutrient intake (2), predominantly in the form of GLP-1(7-36) amide (henceforth GLP-1) (3).  
41 Activation of the GLP-1 receptor (GLP-1R) by GLP-1 stimulates insulin release and inhibits  
42 glucagon secretion in a glucose-dependent manner (4). Also, GLP-1 delays gastric emptying (5),  
43 increases satiety, suppresses food intake, and reduces weight in humans (6, 7). Multiple  
44 injectable peptidic GLP-1R agonists are approved for the treatment of Type 2 diabetes mellitus  
45 (T2DM) (8), including liraglutide which is also approved for the treatment of obesity (9).  
46 Excitement has grown in this drug class, with several GLP-1R agonists demonstrating benefit in  
47 cardiovascular outcomes studies (10). However, a drawback of these medicines has been the  
48 necessity for administration by subcutaneous injection, which limits patient utilization and may  
49 reduce opportunities for fixed-dose combination treatments with other small-molecule drugs.  
50 Importantly, patients prefer, and are more likely to adhere to, an oral drug regimen versus an  
51 injectable alternative (11). An orally administered formulation of the peptidic GLP-1R agonist  
52 semaglutide was recently approved for the treatment of T2DM (12). This peptidic drug is co-  
53 formulated with sodium N-[8-(2-hydroxybenzoyl) amino] caprylate (SNAC), a purported gastric  
54 absorption enhancer, to promote oral bioavailability. The dosage must be taken once daily in the  
55 fasted state with minimal liquid and at a substantially higher dose than the approved once-weekly  
56 injectable formulation (12, 13). Thus, we sought to identify a small-molecule GLP-1R agonist  
57 that is orally bioavailable using standard formulations, and has the potential to be combined with  
58 other oral small molecule therapeutics.

59 The GLP-1R is a seven-transmembrane-spanning, class B, G protein-coupled receptor (GPCR)  
60 (14). Class B GPCRs, including GLP-1R, are activated by endogenous peptide hormones, and  
61 the development of small-molecule agonists of these receptors has proven particularly  
62 challenging (14). Significant prior efforts across the pharmaceutical industry have failed to  
63 identify potent and efficacious small-molecule agonists of the GLP-1R (15, 16). Given the  
64 significant therapeutic value of this mechanism, we pursued a novel high-throughput screening  
65 strategy that identified a series of small-molecule GLP-1R agonist leads. Optimization of the  
66 lead series resulted in potent agonists that activate the GLP-1R in an unprecedented manner. The  
67 series includes the clinical development candidate PF-06882961, which we show has robust  
68 preclinical efficacy, oral bioavailability, and evidence of glucose-lowering in healthy human  
69 participants.

## 70 **Results**

### 71 *Development of a sensitized assay to identify weak GLP-1R agonists*

72 Binding of GLP-1 to its receptor activates the guanine nucleotide-binding (G) alpha  
73 stimulatory subunit (G $\alpha$ s) of the heterotrimeric G protein complex, stimulating adenylate cyclase  
74 activity, and thereby increasing intracellular concentrations of cyclic adenosine monophosphate  
75 (cAMP) (17). Activation of the GLP-1R by GLP-1 also results in recruitment of  $\beta$ -arrestin-1  
76 ( $\beta$ Arr1) and  $\beta$ -arrestin-2 ( $\beta$ Arr2), which mediate receptor internalization and may serve as  
77 scaffolds for G protein-independent signaling (18, 19). The human GLP-1R has an unusually  
78 high activation barrier and is essentially silent in the absence of an agonist ligand, relative to  
79 other class B GPCRs (e.g. the gastric inhibitory polypeptide and parathyroid hormone 1  
80 receptors) (20). We hypothesized that a positive allosteric modulator (PAM) could be used as a

81 tool to lower this activation barrier, thereby increasing assay sensitivity and facilitating the  
82 detection of weak agonists in a cell-based functional assay.

83 The PAM 4-(3-(benzyloxy)phenyl)-2-ethylsulfanyl-6-(trifluoromethyl)pyrimidine (BETP,  
84 Fig. 1A) had been reported to potentiate GLP-1R-mediated cAMP signaling in response to weak  
85 peptidic agonists, including the GLP-1 metabolite GLP-1(9–36)amide (21) and the GLP-  
86 1R/glucagon-receptor dual agonist oxyntomodulin (22). Further work demonstrated that BETP  
87 positively modulates GLP-1R function through covalent modification of cysteine 347 located on  
88 the third intracellular loop (23). We postulated that a BETP-sensitized assay would prove  
89 effective for identifying weak agonists and were pleased to observe potentiation of GLP-1R-  
90 mediated cAMP signaling in response to the weak non-peptide GLP-1R agonist BOC5 (24) (Fig.  
91 S1A) in Chinese hamster ovary (CHO) cells stably expressing the human GLP-1R (Fig. 1B). In  
92 particular, the positive impact on maximal effect ( $E_{max}$ ) in this assay format significantly  
93 improves the chances of identifying weak agonists during high-throughput screening (HTS).  
94 Further confidence in the assay design came from testing the effects of BETP on receptor-  
95 mediated  $\beta$ Arr signaling. Peptide agonist **1** (Fig. S1B), identified during our earlier efforts to  
96 design orally available peptidic GLP-1R agonists (25), is a full ( $E_{max}$ ) cAMP agonist (Fig. 1C),  
97 but a partial  $\beta$ Arr agonist (Fig. 1D) at the GLP-1R. BETP improved the potencies of peptide **1**  
98 for both pathways and potentiated the  $E_{max}$  for  $\beta$ Arr recruitment (Fig. 1C and 1D, Table S1). The  
99 observed potentiation of both the cAMP and  $\beta$ Arr signaling pathways was consistent with our  
100 hypothesis that BETP treatment resulted in general receptor sensitization, rather than a pathway-  
101 specific signaling amplification.

102 Our BETP-sensitized cAMP screening assay (SA +BETP) was adapted to a single-point  
103 format and employed in an HTS of 2.8 million compounds from the Pfizer compound collection.

104 A hit was defined by a threshold of >30% effect (i.e., >30% of the  $E_{\max}$  of GLP-1) at 10  $\mu$ M and  
105 the screen resulted in a low confirmed hit-rate of 0.013%. A series of pyrimidine derivatives  
106 exemplified by **2** emerged from these hits (Fig. 2A). Compound **2** was inactive as a GLP-1R  
107 agonist in the unpotentiated cAMP screening assay (SA), which did not include BETP, but  
108 demonstrated a ~70% effect at 20  $\mu$ M in the presence of BETP (Fig. 1E). This non-traditional  
109 screening approach carried the risk that the GLP-1R agonist lead series might remain dependent  
110 on the presence of BETP to activate the receptor, and it was unclear at the outset whether we  
111 would observe GLP-1R agonism in the absence of BETP. However, as analogs were identified  
112 with improved cAMP potency in the BETP-sensitized assay, we also observed a gradual increase  
113 in signaling efficacy in the absence of BETP (Fig. 2B) to the point where a dose-response curve  
114 and half-maximal effective concentration ( $EC_{50}$ ) could be defined. For weaker agonists, BETP  
115 potentiated cAMP potency by ~100-fold. As potency improved to below ~100 nM in the absence  
116 of BETP, the impact of the PAM gradually diminished (Fig. 2C). This observation is consistent  
117 with the relatively minimal effect of BETP on signaling of the potent GLP-1R endogenous  
118 agonist GLP-1, compared to the weaker agonist GLP-1(9-36)amide, whose effects are  
119 potentiated by BETP (21).

120

### 121 *Lead series optimization*

122 Our goal was to enhance interactions of the small-molecule agonists with the GLP-1R  
123 through lowering the energy barrier to achieve the receptor-bound agonist conformation, and by  
124 adjusting polar substituents, with minimal increases in molecular weight. Four structural regions  
125 were considered in our quest to improve GLP-1R agonist activity of small molecule **2**: the  
126 piperidine ring (yellow), the benzyl ether (green), the 5-fluoro-pyrimidine (blue), and the

127 benzimidazole (red), as highlighted in Fig. 2A. The piperidine ring (yellow) proved optimal in  
128 structure-activity relationship (SAR) studies, although other 6-membered rings (e.g., piperazine,  
129 cyclohexane) also demonstrated GLP-1R agonism. Likewise, the 4-chloro-2-fluoro-benzyl ether  
130 substituent (green) was effective at activating the receptor. Small substituents at the 4-position  
131 (e.g., chloro, fluoro, cyano) provided the greatest potency. Significant potency improvements  
132 were achieved by replacing the 5-fluoro-pyrimidine (blue) with a pyridyl group. The pyridine  
133 appears to optimize the preferred conformation of the pendent benzyl ether through repulsion of  
134 the oxygen and nitrogen lone pairs (26). Removal of the fluorine likely favors the preferred  
135 torsion angle between the aromatic ring and the piperidine. Combining these changes with the  
136 incorporation of a more polar 6-aza-benzimidazole led to **3** ( $EC_{50} = 77$  nM in SA + BETP),  
137 which was >100-fold more potent than HTS hit **2** (Fig. S2, Table S2) and now active in the  
138 cAMP assay without BETP (SA  $EC_{50} = 2600$  nM). It was also encouraging that this compound  
139 recruited  $\beta$ Arr in the presence of BETP ( $EC_{50} = 9600$  nM, Table S3). However, small-molecule **3**  
140 was quite lipophilic ( $\log D_{7.4} = 5.7$ ), resulting in high metabolic intrinsic clearance in human liver  
141 microsomes (HLM) ( $CL_{int} = 130$  mL/min/kg, Table S4), which would likely lead to a short  
142 pharmacokinetic half-life ( $t_{1/2}$ ) and the requirement for an unacceptably high daily dose in  
143 humans. The high lipophilicity was also associated with off-target pharmacology such as  
144 inhibition of the human ether-a-go-go-related gene (hERG) ion channel ( $IC_{50} = 5.6$   $\mu$ M, Table  
145 S4). Inhibition of the hERG channel can cause fatal cardiac arrhythmias in humans (27).

146 During our earlier efforts to identify orally available peptides (25), we recognized the  
147 important role that carboxylic acid substituents played in activating the GLP-1R. Therefore, we  
148 sought to incorporate an acid substituent to improve both potency and physiochemical properties.  
149 In the absence of structural information for the GLP-1R, the design of acid-containing ligands

150 was driven by SAR and the observation that polarity was better tolerated in the benzimidazole  
151 (red) region (Fig. 2A). For example, the introduction of a carboxylic acid-containing substituent  
152 at the 7-position of the benzimidazole (red) yielded **4** (Fig. S2 and Table S2). Compound **4**  
153 demonstrated comparable potency to **3** ( $EC_{50} = 4.6 \mu\text{M}$ ; Table S2), but with markedly lower  
154 lipophilicity ( $\log D_{7.4} = 2.3$ ) (Table S4), indicating that the acid was likely making a productive  
155 interaction (28). A carboxylic acid directly attached to the 6-position of the benzimidazole  
156 proved optimal towards improvements in potency. For example, **5** (Fig. 2A) was a potent GLP-  
157 1R agonist (SA  $EC_{50} = 95 \text{ nM}$ ; Table S2) with moderate  $CL_{\text{int}}$  in HLM and human hepatocyte  
158 metabolic stability assays, and excellent selectivity against the hERG channel ( $>100 \mu\text{M}$ , Table  
159 S4).

160 During lead optimization, less-sensitive cell assays are valuable for distinguishing the  
161 contributions of affinity and efficacy in the cellular response to an agonist (29). Therefore, we  
162 sought a less-sensitive functional assay with reduced receptor expression levels to enable the  
163 optimization of efficacy-driven GLP-1R agonists for clinical development. Considering the lack  
164 of robust cellular models for endogenous human GLP-1R, we developed a cell line with a GLP-  
165 1R density more comparable with endogenous tissue levels (30). The receptor density (Fig. 2D)  
166 for the candidate selection (CS) cell line (CS  $B_{\text{max}}$ :  $500 \pm 28 \text{ fmol/mg}$ ) was ~4.3-fold lower than  
167 the cell line used for primary screens (SA  $B_{\text{max}}$ :  $2200 \pm 80 \text{ fmol/mg}$ ). In the setting of lower  
168 GLP-1R levels in this CS cell line, small molecule **5** remained a full agonist (Fig. 2E) but was  
169 ~20-fold less potent (CS  $EC_{50} = 2.1 \mu\text{M}$ , Table S2), suggesting that further potency  
170 improvements would be required. Optimizing the substituent on the benzimidazole nitrogen  
171 proved a fruitful approach to improve potency without detrimentally impacting physiochemical  
172 properties, with smaller, more polar groups preferred. For example, a methylene-linked oxetane

173 increased potency ~100-fold relative to the methyl substituent of **5**, leading to the identification  
174 of PF-06882961, which is a full agonist ( $EC_{50} = 13$  nM) in the CS cAMP assay (Fig. 3A, Table  
175 S2). PF-06882961 also incorporates a nitrile replacement for the chloride in the benzyl ether  
176 region, which served to reduce  $CL_{int}$  in HLM as well as in human hepatocytes (Table S4).

177

### 178 ***Molecular pharmacology of PF-06882961***

179 The individual contributions of cAMP signaling and  $\beta$ Arr recruitment pathways towards  
180 the therapeutic efficacy of marketed GLP-1R agonists remain ill-defined (18, 19). Therefore, we  
181 sought *in vitro* signaling profiles that were comparable to the marketed peptide agonists during  
182 our candidate selection efforts. PF-06882961 agonist activity was assessed at both the cAMP and  
183  $\beta$ Arr pathways and compared to the marketed GLP-1R agonists exenatide and liraglutide. The  
184 potency of PF-06882961 (CS  $EC_{50} = 13$  nM) on the cAMP pathway was approximately 120- and  
185 14-fold (Fig 3A, Table S2) lower than exenatide (CS  $EC_{50} = 0.11$  nM) and liraglutide (CS  $EC_{50} =$   
186 0.95 nM), respectively. The ability of PF-06882961 and marketed peptides to engage  $\beta$ Arr was  
187 further assessed using PathHunter<sup>®</sup> technology (Fig. 3B, Table S5). PF-06882961 was a partial  
188 agonist in recruiting  $\beta$ Arr2 ( $EC_{50} = 490$  nM,  $E_{max} = 36\%$ ), while exenatide ( $\beta$ Arr2  $EC_{50} = 9.0$   
189 nM,  $E_{max} = 75\%$ ) and liraglutide ( $\beta$ Arr2  $EC_{50} = 20$  nM,  $E_{max} = 99\%$ ) were respectively 54- and  
190 23-fold more potent with greater  $E_{max}$  values.  $\beta$ Arr1 responses closely mirrored those of  $\beta$ Arr2  
191 (Table S5). Calculation of pathway bias (31) supports the assertion that, that relative to  
192 liraglutide, both PF-06882961 and exenatide have slight (~5-fold) signaling bias towards the  
193 cAMP pathway relative to  $\beta$ Arr recruitment (Fig. S3).

194  $\beta$ Arr recruitment at the GLP-1R leads to internalization of the receptor toward endosomal  
195 compartments, which has been proposed to impact receptor desensitization and signaling



196 duration in preclinical models (18, 19). As a complementary approach to probing the  $\beta$ Arr  
197 pathway, we quantified agonist-induced GLP-1R internalization using human embryonic kidney  
198 (HEK) 293 cells stably expressing a fluorogen-activated protein (FAP)-tagged version of the  
199 human GLP-1R (Fig. 3C). Initial experiments confirmed that PF-06882961 and peptide agonists  
200 retain similar rank order potency and full cAMP signaling in this HEK 293 model relative to the  
201 CS assay (Fig. S4). Under identical conditions, treatment with PF-06882961 led to FAP-GLP-1R  
202 internalization ( $EC_{50} = 230$  nM,  $E_{max} = 83\%$ ). Exenatide ( $EC_{50} = 0.60$  nM,  $E_{max} = 125\%$ ) and  
203 liraglutide ( $EC_{50} = 1.8$  nM,  $E_{max} = 117\%$ ) were 380- and 130-fold more potent, respectively, and  
204 caused somewhat greater receptor internalization relative to PF-06882961 (Table S5). Pathway  
205 bias analysis using parameters derived from this cellular model again further supports that,  
206 relative to liraglutide, PF-06882961 has minor (~3-fold) bias away from internalization (vs.  
207 cAMP). Finally, agonist-induced internalization and recycling of a green fluorescent protein  
208 (GFP)-tagged human GLP-1R construct expressed in HEK 293 cells was visualized using  
209 confocal microscopy (Fig. 3D). Consistent with the FAP-based approach, stimulation with PF-  
210 06882961 for 30 minutes triggered marked intracellular accumulation of GFP-GLP-1R, which  
211 was reversible following a 2-hour washout period.

212 To further define the pharmacological profile of PF-06882961, we sought to determine its  
213 binding affinity using radioligand binding assays. In competition experiments using [ $^{125}$ I]-GLP-1  
214 as the radiolabeled probe, the inhibition constant ( $K_i$ ) of PF-06882961 for the GLP-1R ( $K_i = 360$   
215 nM) (Fig. 3E) was 3900- and 82-fold lower than exenatide ( $K_i = 0.092$  nM) and liraglutide ( $K_i =$   
216 4.4 nM), respectively (Table S6). However, given that large peptides like GLP-1 interact with  
217 both the extracellular and transmembrane domains of the GLP-1R (32), and that our small  
218 molecules were unlikely to recapitulate this complex binding mode, it was unclear whether the

219 competition binding experiments with radiolabeled GLP-1 were providing an accurate measure  
220 of affinity (25). Therefore, we developed a novel radiolabeled small-molecule probe, [<sup>3</sup>H]-PF-  
221 06883365, which is expected to bind in the same pocket as PF-06882961 (Fig. S5, Table S6).  
222 The affinity of PF-06882961 ( $K_i = 80$  nM) measured using this new radioligand was 4.5-fold  
223 more potent and more consistent with its cAMP potency, whereas the clinical peptides had  
224 similar affinities using both radioligands (Table S6).

225

### 226 ***Tryptophan 33 in GLP-1R is required for PF-06882961 signaling***

227 Prior to the selection of animal models for *in vivo* pharmacology studies, we  
228 characterized the potential for species differences in GLP-1R activation with our small-molecule  
229 agonists. PF-06882961 stimulated cAMP accumulation in CHO cells expressing both the human  
230 and monkey GLP-1Rs with comparable  $EC_{50}$  values (Fig. S6). In contrast, PF-06882961 did not  
231 increase cAMP levels in cells expressing the mouse, rat, or rabbit GLP-1R. Consistent with this  
232 finding, no improvement in glucose tolerance was observed during an intraperitoneal glucose  
233 tolerance test in C57BL6 mice that were administered a subcutaneous dose of PF-06882961 (10  
234 mg/kg) (Fig. 4A). Comparison of the GLP-1R sequences in human and monkey versus other  
235 species revealed the notable presence of a tryptophan (W) at position 33 of the primate GLP-1R.  
236 In contrast, other species including the mouse, rat, and rabbit GLP-1R contain a serine (S)  
237 residue at position 33. Supporting the crucial role of W33, PF-06882961 increased cAMP  
238 accumulation in cells expressing the S33W mutant of mouse GLP-1R, whereas it failed to induce  
239 signaling at the human W33S receptor (Fig. 4B).

240 In contrast, cAMP signaling in response to GLP-1 was comparable between wild-type  
241 and mutant receptors, supporting the hypothesis that altered signaling with PF-06882961 was not

242 due to a marked alteration of surface expression for the mutated constructs (Fig. 4C). The  
243 importance of W33 in small-molecule activation of GLP-1R was curious since it is located on  
244 the extracellular domain (ECD), distal from the transmembrane domains and connecting loops  
245 directly involved in peptide-induced GPCR activation (20, 32). Overall, our findings were  
246 reminiscent of a previous report describing the 100-fold reduction in the binding affinity of the  
247 small-molecule GLP-1R antagonist T-0632 in the W33S mutant of human GLP-1R (33). It was  
248 postulated that the binding of T-0632 stabilizes a closed, inactive conformation of GLP-1R,  
249 which involves W33 (34).

250           Recent cryogenic electron microscope (cryo-EM) structures of the human and rabbit  
251 GLP-1Rs (bound to exendin-p5 and GLP-1, respectively) indicate that residue 33 does not  
252 interact with peptide agonists but extends towards solvent (Fig. S7) (32, 35). Moreover, the  
253 species selectivity of a GLP-1R monoclonal antibody (Fab 3F52) was attributed to a binding  
254 epitope containing W33 (36, 37), which further supports the hypothesis that W33 is solvent-  
255 exposed. To better understand the role of W33 in small-molecule agonist binding to GLP-1R, we  
256 generated the cryo-EM structure of a PF-06882961 analog (PF-06883365) bound to human  
257 GLP-1R (Fig. 4D). In this structure, the GLP-1R ECD has rotated slightly relative to the peptide-  
258 bound structures, and W33 has moved  $\sim 14$  Å, closing the top of the small-molecule binding  
259 pocket. Consistent with the potency gained from introducing the 6-carboxylic acid motif in the  
260 benzimidazole region, the cryo-EM structure showed that the carboxylic acid of PF-06883365 is  
261 making a productive interaction with an arginine residue at position 380 in the GLP-1R binding  
262 pocket.

263

264 ***PF-06882961 is orally bioavailable and efficacious for lowering glucose and food intake in***  
265 ***monkeys***

266 The pharmacokinetics of PF-06882961 were examined in rats and monkeys after  
267 intravenous (IV) and oral administration (Fig 5A, Table S7). The oral bioavailability of  
268 PF-06882961 in animals was low to moderate and increased in a dose-dependent manner, which  
269 was adequate for studying preclinical *in vivo* efficacy and safety of PF-06882961 delivered via  
270 the oral route in standard formulations.

271 Since PF-06882961 does not activate the rodent GLP-1R, the therapeutic effects of  
272 PF-06882961 on insulin and glucose were examined in an IV glucose tolerance test (IVGTT) in  
273 cynomolgus monkeys. Intravenous infusion of PF-06882961 during the IVGTT led to an  
274 increase in insulin secretion and the rate of glucose disappearance (K-value) (Fig. 5B–D).  
275 Enhancement of glucose-stimulated insulin secretion by PF-06882961 was concentration-  
276 dependent and was also observed following oral dosing with similar efficacy when compared to  
277 administration by IV infusion (Fig. 5E). Once-daily administration of PF-06882961 for 2 days  
278 also inhibited food intake compared to vehicle-treated monkeys (Fig. 5F).

279  
280 ***Oral administration of PF-06882961 shows evidence of glucose-lowering in healthy human***  
281 ***study participants***

282 PF-06882961 was selected as a candidate for clinical studies based on its *in vitro* and *in*  
283 *vivo* pharmacologic and disposition profile, including potent agonism of the GLP-1R, preclinical  
284 disposition attributes (e.g., low metabolic CL<sub>int</sub> in human hepatocytes), good safety margins  
285 versus the hERG channel (IC<sub>50</sub> = 4.3 μM, Table S4) and broad panel screening (Table S8), and

286 selectivity versus related class B GPCRs (Table S9). Moreover, adequate safety margins were  
287 observed in repeat-dose rat and monkey toxicology studies, which supported advancing PF-  
288 06882961 to human clinical studies.

289 The safety, tolerability, and pharmacokinetics of PF-06882961 were evaluated in a first-  
290 in-human, Phase 1, randomized, double-blind, placebo-controlled, single ascending dose study in  
291 healthy adult participants. A total of 25 participants in three cohorts were randomized to receive  
292 study treatment. Data from the dose-escalation portion of the study (cohorts 1 and 2) are  
293 presented in this manuscript; in this portion of the study, 17 participants received tablet  
294 formulations of PF-06882961 or matching placebo at single doses ranging from 3 to 300 mg.  
295 Following oral administration under fasted conditions, PF-06882961 was generally well-  
296 tolerated. There were no serious or severe adverse events (AEs) reported, nor discontinuations  
297 due to AEs (Table S10). Most AEs were mild in severity, and a higher proportion of participants  
298 reported an AE following administration of PF-06882961 at the 300 mg dose level, compared  
299 with other study treatments (Table S10). The most common AEs recorded following  
300 administration of PF-06882961 were nausea, vomiting, and decreased appetite, all of which were  
301 considered treatment-related by the investigator and consistent with the expected effects of the  
302 GLP-1R agonist mechanism. Plasma exposure of PF-06882961, as measured by  $AUC_{inf}$  and  
303  $C_{max}$ , appeared to increase in an approximately dose-proportional manner, with mean  $t_{1/2}$  ranging  
304 from 4.3 to 6.1 hours (Fig. 6 and Table S11). Median time ( $T_{max}$ ) to maximal concentration  
305 ( $C_{max}$ ) values ranged from 2.0 to 6.0 hours post-dose. A tablet formulation of PF-06882961 was  
306 also administered under fed conditions at a dose of 100 mg. Assessment of the effect of food on  
307 PF-06882961 administration revealed similar exposure (as measured by  $AUC_{inf}$ ) and  $t_{1/2}$  when

308 administered in the fed state, compared with the fasted state (Table S11), indicating that PF-  
309 06882961 can be dosed in both the fed and fasted states.

310 The primary and secondary endpoints of the study were safety and pharmacokinetic  
311 parameters, and fasting serum glucose was measured pre-dose and post-dose in study  
312 participants, all of whom had glucose and glycated hemoglobin (HbA1c) levels within the  
313 normal reference range for the laboratory. After the administration of single doses of PF-  
314 06882961, exploratory analyses revealed a trend for declining post-dose glucose levels at higher  
315 doses, with an apparent dose-related trend observed at 24 hours post dose (Fig. 6B). All post-  
316 dose glucose levels remained within the normal reference range for the laboratory, and no  
317 adverse events of hypoglycemia were reported.

318 In summary, we developed a novel sensitized HTS assay that identified a series of small  
319 molecule GLP-1R agonists. The series was optimized for pharmacologic potency, safety, and  
320 disposition attributes amenable for use in humans. PF-06882961 demonstrates a balanced *in vitro*  
321 signaling profile, potentiates glucose-stimulated insulin release, and decreases food intake in  
322 monkeys, and is orally available in healthy human participants. To our knowledge, this is the  
323 first literature report on glucose-lowering with an oral small-molecule agonist of the GLP-1R in  
324 humans.

325 **References and Notes:**

- 326
- 327 1. D. J. Drucker, S. Mojsov, J. F. Habener, Cell-specific post-translational processing of
- 328 preproglucagon expressed from a metallothionein-glucagon fusion gene. *J Biol Chem*
- 329 **261**, 9637-9643 (1986).
- 330 2. C. Orskov *et al.*, Glucagon-like peptides GLP-1 and GLP-2, predicted products of the
- 331 glucagon gene, are secreted separately from pig small intestine but not pancreas.
- 332 *Endocrinology* **119**, 1467-1475 (1986).
- 333 3. C. Orskov, L. Rabenhøj, A. Wettergren, H. Kofod, J. J. Holst, Tissue and plasma
- 334 concentrations of amidated and glycine-extended glucagon-like peptide I in humans.
- 335 *Diabetes* **43**, 535-539 (1994).
- 336 4. B. Kreymann, G. Williams, M. A. Ghatei, S. R. Bloom, Glucagon-like peptide-1 7-36: a
- 337 physiological incretin in man. *Lancet*. **2**, 1300-1304 (1987).
- 338 5. M. A. Nauck *et al.*, Glucagon-like peptide 1 inhibition of gastric emptying outweighs its
- 339 insulinotropic effects in healthy humans. *Am J Physiol* **273**, E981-988 (1997).
- 340 6. D. J. Drucker, Mechanisms of action and therapeutic application of glucagon-like peptide-
- 341 1. *Cell Metab* **27**, 740-756 (2018).
- 342 7. R. Burcelin, P. Gourdy, Harnessing glucagon-like peptide-1 receptor agonists for the
- 343 pharmacological treatment of overweight and obesity. *Obes Rev* **18**, 86-98 (2017).
- 344 8. M. Nauck, Incretin therapies: highlighting common features and differences in the modes
- 345 of action of glucagon-like peptide-1 receptor agonists and dipeptidyl peptidase-4
- 346 inhibitors. *Diabetes Obes Metab* **18**, 203-216 (2016).
- 347 9. Novo Nordisk Inc. (2018), vol. 2019.
- 348 10. N. B. Dalsgaard, A. Bronden, T. Vilsboll, F. K. Knop, Cardiovascular safety and benefits
- 349 of GLP-1 receptor agonists. *Expert Opin Drug Saf* **16**, 351-363 (2017).

- 350 11. M. D. Dibonaventura *et al.*, Multinational Internet-based survey of patient preference for  
351 newer oral or injectable Type 2 diabetes medication. *Patient Prefer Adherence* **4**, 397-  
352 406 (2010).
- 353 12. RYBELSUS (R) (semaglutide) package insert, Novo Nordisk Inc., (September 2019).
- 354 13. C. Granhall *et al.*, Safety and pharmacokinetics of single and multiple ascending doses of  
355 the novel oral human GLP-1 analogue, oral semaglutide, in healthy subjects and subjects  
356 with Type 2 diabetes. *Clin Pharmacokinet.* **58**, 781-791 (2019).
- 357 14. C. de Graaf *et al.*, Extending the Structural View of Class B GPCRs. *Trends Biochem Sci*  
358 **42**, 946-960 (2017).
- 359 15. D. J. Edmonds, D. A. Price, Oral GLP-1 modulators for the treatment of diabetes. *Annu*  
360 *Rep Med Chem* **48**, 119-130 (2013).
- 361 16. F. S. Willard, A. B. Bueno, K. W. Sloop, Small molecule drug discovery at the glucagon-  
362 like peptide-1 receptor. *Exp Diabetes Res* **2012**, 709893 (2012).
- 363 17. B. Thorens, Expression cloning of the pancreatic beta cell receptor for the gluco-incretin  
364 hormone glucagon-like peptide 1. *Proc Natl Acad Sci U S A* **89**, 8641-8645 (1992).
- 365 18. M. M. Fletcher, M. L. Halls, A. Christopoulos, P. M. Sexton, D. Wootten, The  
366 complexity of signalling mediated by the glucagon-like peptide-1 receptor. *Biochem Soc*  
367 *Trans* **44**, 582-588 (2016).
- 368 19. B. Jones *et al.*, Targeting GLP-1 receptor trafficking to improve agonist efficacy. *Nat*  
369 *Commun* **9**, 1602 (2018).
- 370 20. J. P. Fortin *et al.*, Membrane-tethered ligands are effective probes for exploring class B1  
371 G protein-coupled receptor function. *Proc Natl Acad Sci U S A* **106**, 8049-8054 (2009).
- 372 21. D. Wootten *et al.*, Allosteric modulation of endogenous metabolites as an avenue for drug  
373 discovery. *Mol Pharmacol* **82**, 281-290 (2012).



- 374 22. F. S. Willard *et al.*, Small molecule allosteric modulation of the glucagon-like peptide-1  
375 receptor enhances the insulinotropic effect of oxyntomodulin. *Mol Pharmacol* **82**, 1066-  
376 1073 (2012).
- 377 23. W. M. Nolte *et al.*, A potentiator of orthosteric ligand activity at GLP-1R acts via  
378 covalent modification. *Nat Chem Biol* **10**, 629-631 (2014).
- 379 24. D. Chen *et al.*, A nonpeptidic agonist of glucagon-like peptide 1 receptors with efficacy  
380 in diabetic db/db mice. *Proc Natl Acad Sci U S A* **104**, 943-948 (2007).
- 381 25. H. N. Hoang *et al.*, Short hydrophobic peptides with cyclic constraints are potent  
382 glucagon-like peptide-1 receptor (GLP-1R) agonists. *J Med Chem* **58**, 4080-4085 (2015).
- 383 26. K. A. Brameld, B. Kuhn, D. C. Reuter, M. Stahl, Small molecule conformational  
384 preferences derived from crystal structure data. A medicinal chemistry focused analysis.  
385 *J Chem Inf Model* **48**, 1-24 (2008).
- 386 27. M. Recanatini, E. Poluzzi, M. Masetti, A. Cavalli, F. De Ponti, QT prolongation through  
387 hERG K(+) channel blockade: current knowledge and strategies for the early prediction  
388 during drug development. *Med Res Rev* **25**, 133-166 (2005).
- 389 28. T. W. Johnson, R. A. Gallego, M. P. Edwards, Lipophilic Efficiency as an Important  
390 Metric in Drug Design. *J Med Chem* **61**, 6401-6420 (2018).
- 391 29. T. Kenakin, Predicting therapeutic value in the lead optimization phase of drug  
392 discovery. *Nat Rev Drug Discov* **2**, 429-438 (2003).
- 393 30. L. B. Knudsen, S. Hastrup, C. R. Underwood, B. S. Wulff, J. Fleckner, Functional  
394 importance of GLP-1 receptor species and expression levels in cell lines. *Regul Pept* **175**,  
395 21-29 (2012).
- 396 31. T. Kenakin, A scale of agonism and allosteric modulation for assessment of selectivity,  
397 bias, and receptor mutation. *Mol Pharmacol* **92**, 414-424 (2017).

- 398 32. Y. L. Liang *et al.*, Phase-plate cryo-EM structure of a biased agonist-bound human GLP-  
399 1 receptor-Gs complex. *Nature* **555**, 121-125 (2018).
- 400 33. E. C. Tibaduiza, C. Chen, M. Beinborn, A small molecule ligand of the glucagon-like  
401 peptide 1 receptor targets its amino-terminal hormone binding domain. *J Biol Chem* **276**,  
402 37787-37793 (2001).
- 403 34. R. L. Dods, D. Donnelly, The peptide agonist-binding site of the glucagon-like peptide-1  
404 (GLP-1) receptor based on site-directed mutagenesis and knowledge-based modelling.  
405 *Biosci Rep* **36**, e00285 (2015).
- 406 35. Y. Zhang *et al.*, Cryo-EM structure of the activated GLP-1 receptor in complex with a G  
407 protein. *Nature* **546**, 248-253 (2017).
- 408 36. S. Hennen *et al.*, Structural insight into antibody-mediated antagonism of the glucagon-  
409 like peptide-1 receptor. *Sci Rep* **6**, 26236 (2016).
- 410 37. C. Pyke *et al.*, GLP-1 receptor localization in monkey and human tissue: novel  
411 distribution revealed with extensively validated monoclonal antibody. *Endocrinology*  
412 **155**, 1280-1290 (2014).
- 413 38. C. Mapelli *et al.*, Eleven amino acid glucagon-like peptide-1 receptor agonists with  
414 antidiabetic activity. *J Med Chem* **52**, 7788-7799 (2009).
- 415 39. G. Aspnes *et al.*, GLP-1 receptor agonists and uses thereof. WO2018109607 A1 (2018).
- 416 40. Y. Cheng, W. H. Prusoff, Relationship between the inhibition constant (K<sub>1</sub>) and the  
417 concentration of inhibitor which causes 50 per cent inhibition (I<sub>50</sub>) of an enzymatic  
418 reaction. *Biochem Pharmacol* **22**, 3099-3108 (1973).
- 419 41. A. E. Carpenter *et al.*, CellProfiler: image analysis software for identifying and  
420 quantifying cell phenotypes. *Genome Biol* **7**, R100 (2006).

- 421 42. T. R. Jones *et al.*, Scoring diverse cellular morphologies in image-based screens with  
422 iterative feedback and machine learning. *Proc Natl Acad Sci U S A* **106**, 1826-1831  
423 (2009).
- 424 43. K. Zhang, Gctf: Real-time CTF determination and correction. *J Struct Biol* **193**, 1-12  
425 (2016).
- 426 44. S. Q. Zheng *et al.*, MotionCor2: anisotropic correction of beam-induced motion for  
427 improved cryo-electron microscopy. *Nat Methods* **14**, 331-332 (2017).
- 428 45. Y. L. Liang *et al.*, Phase-plate cryo-EM structure of a class B GPCR-G-protein complex.  
429 *Nature* **546**, 118-123 (2017).
- 430 46. L. Urnavicius *et al.*, The structure of the dynactin complex and its interaction with  
431 dynein. *Science* **347**, 1441-1446 (2015).
- 432 47. S. H. Scheres, RELION: implementation of a Bayesian approach to cryo-EM structure  
433 determination. *J Struct Biol* **180**, 519-530 (2012).
- 434 48. P. Emsley, B. Lohkamp, W. G. Scott, K. Cowtan, Features and development of Coot.  
435 *Acta Crystallogr D Biol Crystallogr* **66**, 486-501 (2010).
- 436 49. C. R. Underwood *et al.*, Crystal structure of glucagon-like peptide-1 in complex with the  
437 extracellular domain of the glucagon-like peptide-1 receptor. *J Biol Chem* **285**, 723-730  
438 (2010).
- 439 50. P. V. Afonine *et al.*, Real-space refinement in PHENIX for cryo-EM and crystallography.  
440 *Acta Crystallogr D Struct Biol* **74**, 531-544 (2018).
- 441 51. W. L. DeLano, *CCP4 Newsletter On Protein Crystallography* **40**, 82-92 (2002).
- 442 52. F. Lombardo, M. Y. Shalaeva, K. A. Tupper, F. Gao, ElogD(oct): a tool for lipophilicity  
443 determination in drug discovery. 2. Basic and neutral compounds. *J Med Chem* **44**, 2490-  
444 2497 (2001).

- 445 53. D. Stopher, S. McClean, An improved method for the determination of distribution  
446 coefficients. *J Pharm Pharmacol* **42**, 144 (1990).
- 447 54. R. S. Obach, Predicting clearance in humans from in vitro data. *Curr Top Med Chem* **11**,  
448 334-339 (2011).

449

## 450 **Acknowledgments**

451 The authors would like to thank the participants of the FIH study; T. P. Rolph, S. Liras and M. J.  
452 Birnbaum for continued support of the oral GLP-1R agonist program; M. E. Flanagan for sharing  
453 expertise in medicinal chemistry; G. E. Aspnes, S. B. Coffey, E. L. Conn, A. Dion, M. S.  
454 Dowling, G. Ingle, W. Jiao, A. Shavnya, and L. Wei for compound synthesis and route design; J.  
455 N. Bradow, J. K. Smith, and X. Wang for analytical support; J. X. Kong, L. Rogers, J. J. Shah,  
456 and K. A. Stevens for the execution of *in vitro* activity assays; K. Schildknecht for overseeing  
457 radiosynthesis; B. L. Bernardo, S. Joaquim, N. Nammi, and A. H. Smith for execution of *in vivo*  
458 testing; D. Gates and K. N. Yip for compound formulation; H. Eng for pharmacokinetics assay  
459 execution; K. F. Fennell for protein reagent generation; D. N. Gorman and A. Bannerjee for  
460 statistical support; S. Farenden and E. Madigan for coordinating pharmaceutical science  
461 activities; M. Popovitz, M. C. Sanford, and S. Uppal for clinical study execution; M. J. Vorko for  
462 project management; X. Qiu, J. Pandit and A. H. Varghese for supporting the Pfizer membrane  
463 protein CryoEM initiative; and Sosei Heptares for generating a stabilized GLP-1 receptor  
464 construct using their proprietary StaR<sup>®</sup> technology to enable our structural studies. This study  
465 was sponsored by Pfizer Inc. Medical writing support, under the direction of the authors, was  
466 provided by Eric Comeau, Ph.D., of CMC Connect, McCann Health Medical Communications  
467 and was funded by Pfizer Inc., New York, NY, USA, in accordance with Good Publication  
468 Practice (GPP3) guidelines (Ann Intern Med 2015;163:461–464).

469

470 **Funding**

471 This study was sponsored by Pfizer Inc.

472

473 **Author contributions**

474 Formulation or evolution of overarching research goals and aims: DAG, ASK, DJE, JBK, PML,

475 VMJ, JPF

476 Data curation: JBK, DRD, PML, JPF

477 Application of statistical and/or mathematical analyses: ARS, JBK, DRD, CB, JPF

478 Acquisition of funding: VMJ

479 Conducting the research and/or collecting data: DAG, ASK, AMM, CL, SWB, ARS, SH, DJE,

480 MCG, JBK, DRD, JMD, VMJ, JMC, CB, RBR, DJL, JPF, YL, DAT, MSL

481 Project administration: MSL, DAP

482 Provision of study resources including animals and patients: VMJ, MSL

483 Implementation of the relevant software or computer programs: CB

484 Oversight and leadership of the study planning and execution: DAG, ARS, SH, DJE, JBK, PML,

485 JMD, VMJ, CB, DJL, JPF, MSL

486 Data verification and validation: ASK, SWB, ARS, DWP, MCG, JBK, DRD, PML, CB, JPF,

487 DAT, MSL

488 Preparation of the data and graphical elements of the paper: DAG, ASK, CL, DWP, DJE, JBK,

489 DRD, PML, JMD, CB, JPF, YL, DAT

490 Preparation of the written elements of the paper: DAG, ASK, CL, ARS, DWP, DJE, JBK, DRD,

491 PML, JMD, JPF, YL

492 Editing and reviewing of the paper: DAG, ASK, AMM, CL, SWB, ARS, DWP, SH, DJE, MCG,  
493 JBK, DRD, PML, JMD, CB, RBR, DJL, JMC, JPF, YL, MSL, DAP

494

495 **Competing interests**

496 ASK, AMM, MCG, JMD, CB, CL, SWB, DJL, PML, DRD, JMC, JPF, YL, ARS, DAT, DWP,  
497 SH, RBR, MSL, and DAG are employees and stockholders of Pfizer Inc. DAP, DJE, JBK and  
498 VMJ are stockholders of Pfizer Inc.

499 **Data and materials availability**

500 Upon request, and subject to certain criteria, conditions, and exceptions  
501 (see <https://www.pfizer.com/science/clinical-trials/trial-data-and-results> for more information),  
502 Pfizer will provide access to individual de-identified participant data from Pfizer-sponsored  
503 global interventional clinical studies conducted for medicines, vaccines and medical devices (1)  
504 for indications that have been approved in the US and/or EU or (2) in programs that have been  
505 terminated (i.e., development for all indications has been discontinued). Pfizer will also consider  
506 requests for the protocol, data dictionary, and statistical analysis plan. Data may be requested  
507 from Pfizer trials 24 months after study completion. The de-identified participant data will be  
508 made available to researchers whose proposals meet the research criteria and other conditions,  
509 and for which an exception does not apply, via a secure portal. To gain access, data requestors  
510 must enter into a data access agreement with Pfizer. Pfizer shares compounds using requests via  
511 the ‘compound transfer program’ (see [https://www.pfizer.com/science/collaboration/compound-](https://www.pfizer.com/science/collaboration/compound-transfer-program)  
512 [transfer-program](https://www.pfizer.com/science/collaboration/compound-transfer-program)).

513  
514

515 **Supplementary Materials:**

516 Materials and Methods

517 Figures S1–S7

518 Tables S1–S11

519 References (38-54)

520



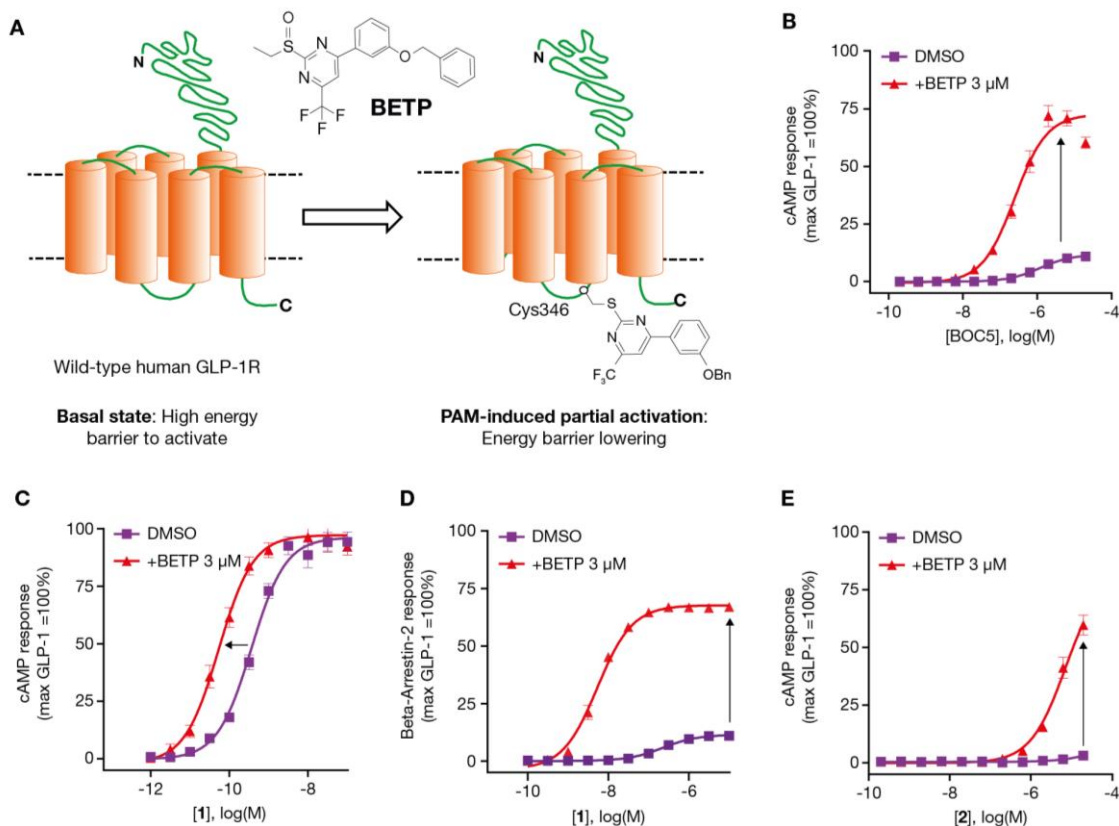

521

522 **Fig. 1. Identification of small-molecule GLP-1R agonists in a CHO-GLP-1R cellular assay**

523 **in the absence or presence of the positive allosteric modulator BETP. (A)** Assay concept:

524 Covalent modification of Cys347 in the GLP-1R by BETP lowers receptor activation barrier,

525 enabling the identification of weak agonists. **(B–D)** Validation of the BETP-sensitized screening

526 assay. **(B)** BETP potentiates agonist-induced cAMP production of small molecule (BOC5) (Fig.

527 S1). **(C–D)** BETP potentiates cAMP production **(C)** and  $\beta$ -arrestin recruitment **(D)** by peptide **1**

528 (Fig. S1) at the human GLP-1R. **(E)**, cAMP curves of a representative small molecule HTS hit,

529 compound **2** (Fig. 2). Data represent the mean  $\pm$  SEM.

530 BETP, 4-(3-(benzyloxy)phenyl)-2-ethylsulfinyl-6-(trifluoromethyl)pyrimidine; cAMP, cyclic

531 adenosine monophosphate; DMSO, dimethyl sulfoxide; GLP-1R, glucagon-like peptide-1

532 receptor; HTS, high-throughput screening; PAM, positive allosteric modulator; SEM, standard  
533 error of the mean.

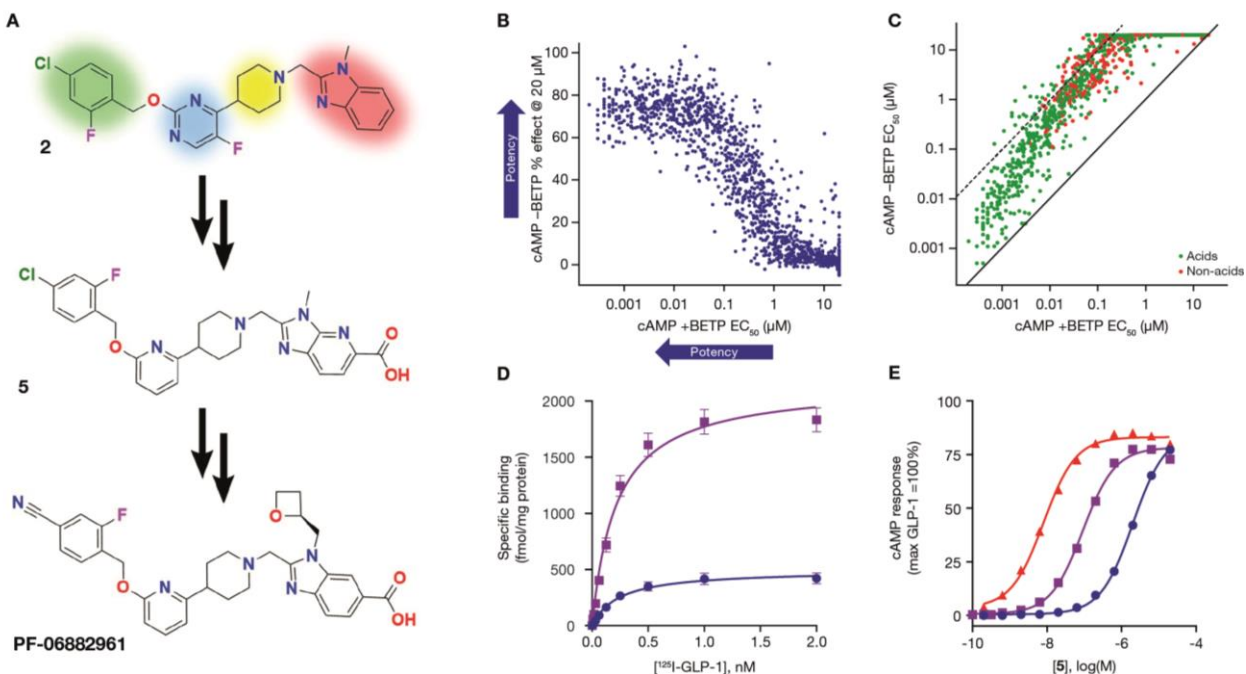

534

535

536

537

538

539

540

541

542

543

544

545

546

547

**Fig. 2. Optimization of small-molecule 2 culminating in the identification of the clinical**

**candidate PF-06882961. (A)** Structure of small molecule HTS hit 2, intermediate analog 5, and

clinical candidate PF-06882961. Four structural regions were considered in our efforts to

improve GLP-1R agonist activity of 2: the piperidine ring (yellow), the benzyl ether (green), the

5-fluoro-pyrimidine (blue), and the benzimidazole (red). **(B)** Early evidence of activity in the

cAMP assay without BETP. Increased cAMP release (% effect) at 20 μM concentration of test compounds was observed in the absence of BETP as potency (EC<sub>50</sub>) improved in the presence of

BETP. **(C)** Small molecule agonist activity independent of BETP sensitization. Increased cAMP

potency (EC<sub>50</sub>) was observed in the absence of BETP as potency improved in the presence of

BETP (●, non-acids; ●, acid-containing analogs). **(D–E)** Candidate selection CHO-GLP-1R cell

line with lower GLP-1R expression level confirms the efficacy-driven nature of small molecule 5

agonism at the human GLP-1R. Data represent the mean ± SEM. **(D)** Saturation binding analysis

in CHO cells expressing higher (■, SA) and lower (●, CS) human GLP-1R density. **(E)** Small

548 molecule **5** induced cAMP signaling in CS cell line (●), as well as in the SA in the presence (▲ )  
549 or absence (■) of BETP.  
550 BETP, 4-(3-(benzyloxy)phenyl)-2-ethylsulfinyl-6-(trifluoromethyl)pyrimidine; cAMP, cyclic  
551 adenosine monophosphate; CHO, Chinese hamster ovary; CS, candidate selection assay; EC<sub>50</sub>,  
552 concentration at half maximal effect; GLP-1R, glucagon-like peptide-1 receptor; HTS, high-  
553 throughput screening; SA, screening assay; SEM, standard error of the mean.

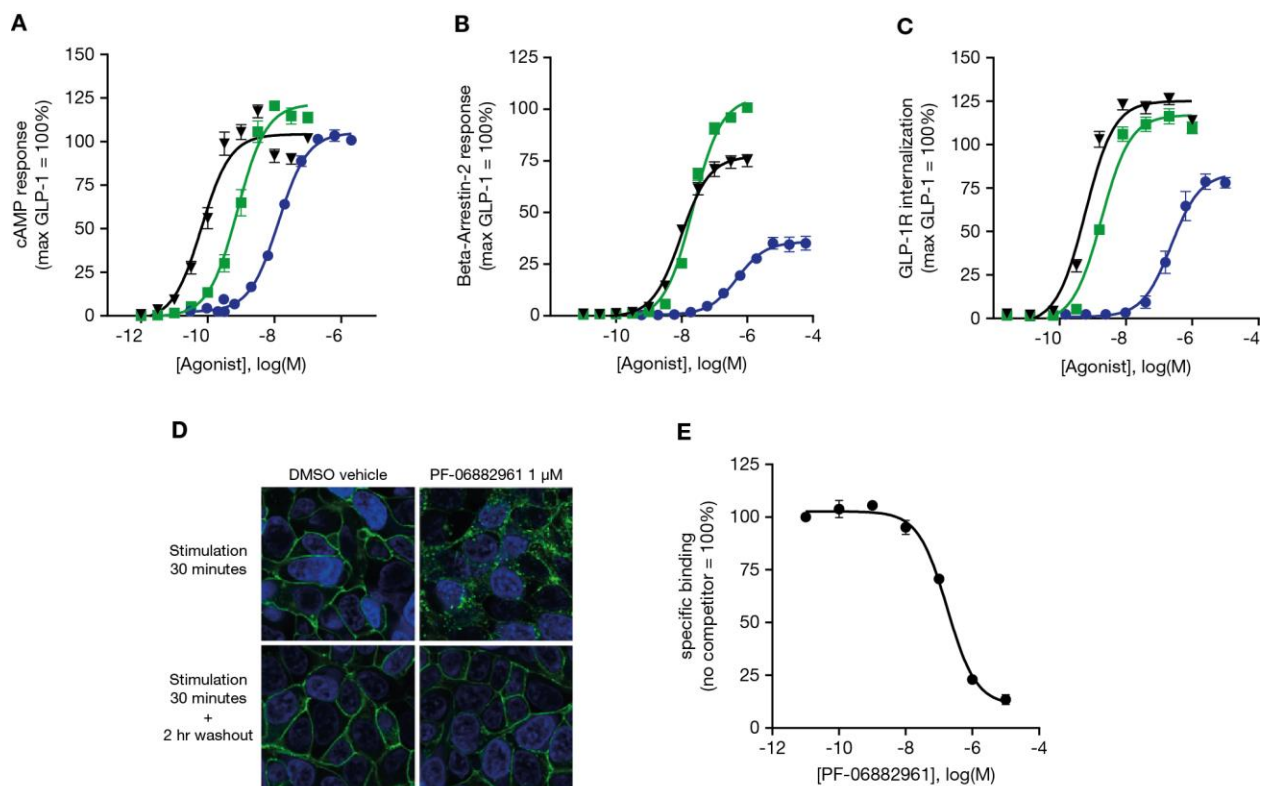

554  
555 **Fig. 3. Molecular pharmacology of small molecule GLP-1R agonist PF-06882961. (A)**

556 Average cAMP curves for exenatide (▼), liraglutide (■), and PF-06882961 (●) in the candidate  
557 selection cell line. (B) Average β-arrestin recruitment curves for exenatide (▼), liraglutide (■),  
558 and PF-06882961 (●). (C) GLP-1R agonist driven receptor internalization assessed using FAP-  
559 tagged human GLP-1R stably expressed in HEK293 cells. Data represent the mean ± SEM from  
560 three independent experiments, each performed in triplicate. (D) Assessment of PF-06882961-  
561 induced internalization and recycling of a GFP-tagged human GLP-1R (green) in HEK 293 cell  
562 construct (blue nuclear staining) using confocal microscopy. (E) Competition binding curve for  
563 PF-06882961 using the [<sup>3</sup>H]-PF-06883365 probe. Data represent the mean ± SEM.

564 cAMP, cyclic adenosine monophosphate; CHO, Chinese hamster ovary; DMSO, dimethyl  
565 sulfoxide; FAP, fluorogen-activated protein; GFP, green fluorescent protein; GLP-1R, glucagon-  
566 like peptide-1 receptor; HEK 293, human embryonic kidney 293; SEM, standard error of the  
567 mean.

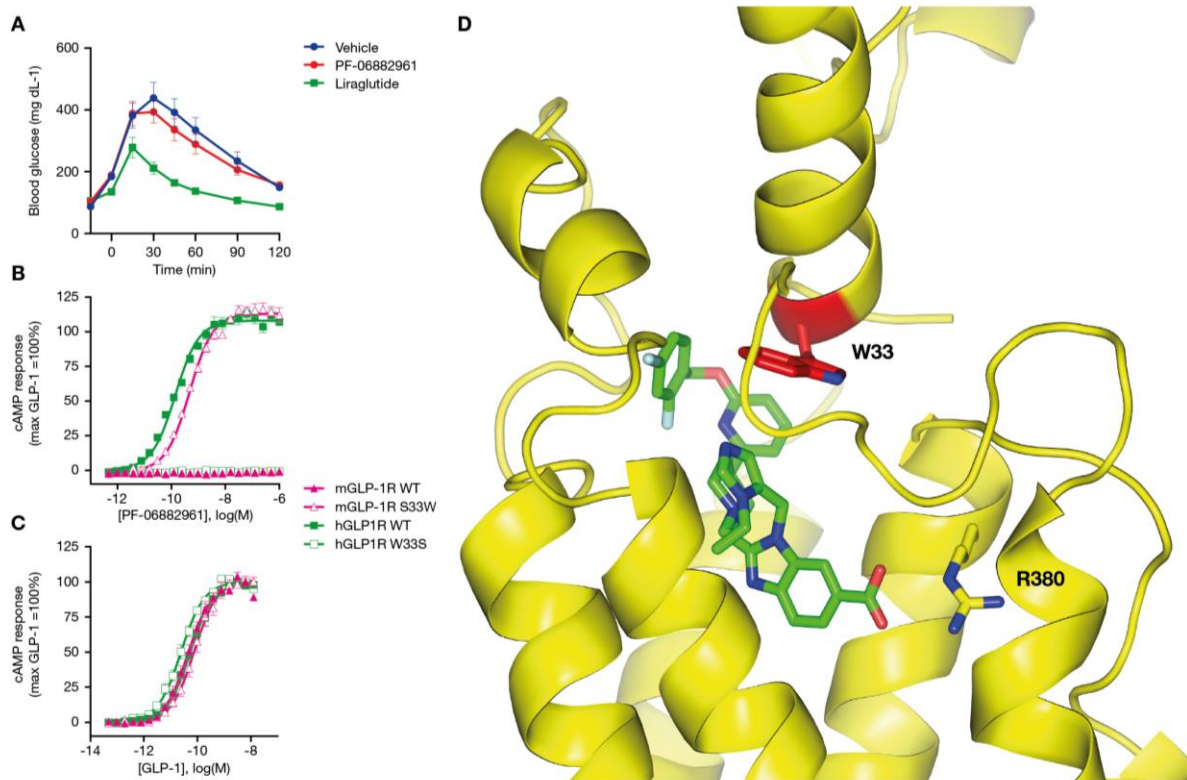

568

569 **Fig. 4. Tryptophan 33 is critical for the function of small-molecule GLP-1R agonists.** (A) In  
570 contrast to liraglutide, PF-06882961 does not reduce glucose AUC during an intraperitoneal  
571 glucose tolerance test in C57BL/6 mice. (B, C) In contrast to GLP-1, PF-06882961 promotes  
572 cAMP production in GLP-1R-expressing cells only when residue 33 is tryptophan (W), not  
573 serine (S). (B) PF-06882961 signals in CHO cells expressing human-GLP-1R (■), but not the  
574 mouse-GLP-1R (▲). PF-06882961 signaling is restored in CHO cells expressing mouse-GLP-  
575 1R S33W (△) and is negated in human-GLP-1R W33S (□). (C) GLP-1 promotes signaling in  
576 mouse and human wild-type and mutant constructs. (D) Cryo-EM structure of PF-06883365  
577 (green) bound to human GLP-1R. W33 closes the top of the small-molecule binding pocket.  
578 Arginine 380 (R380) interacts with the carboxylic substituent of the small molecule agonist.  
579 Helix 4 was removed from the figure for clarity. Data represent the mean ± SEM.

580 AUC, area under the curve; cAMP, cyclic adenosine monophosphate; CHO, Chinese hamster  
581 ovary; Cryo-EM, cryogenic electron microscope; GLP-1R, glucagon-like peptide-1 receptor; h,  
582 human; m, mouse; SEM, standard error of the mean.

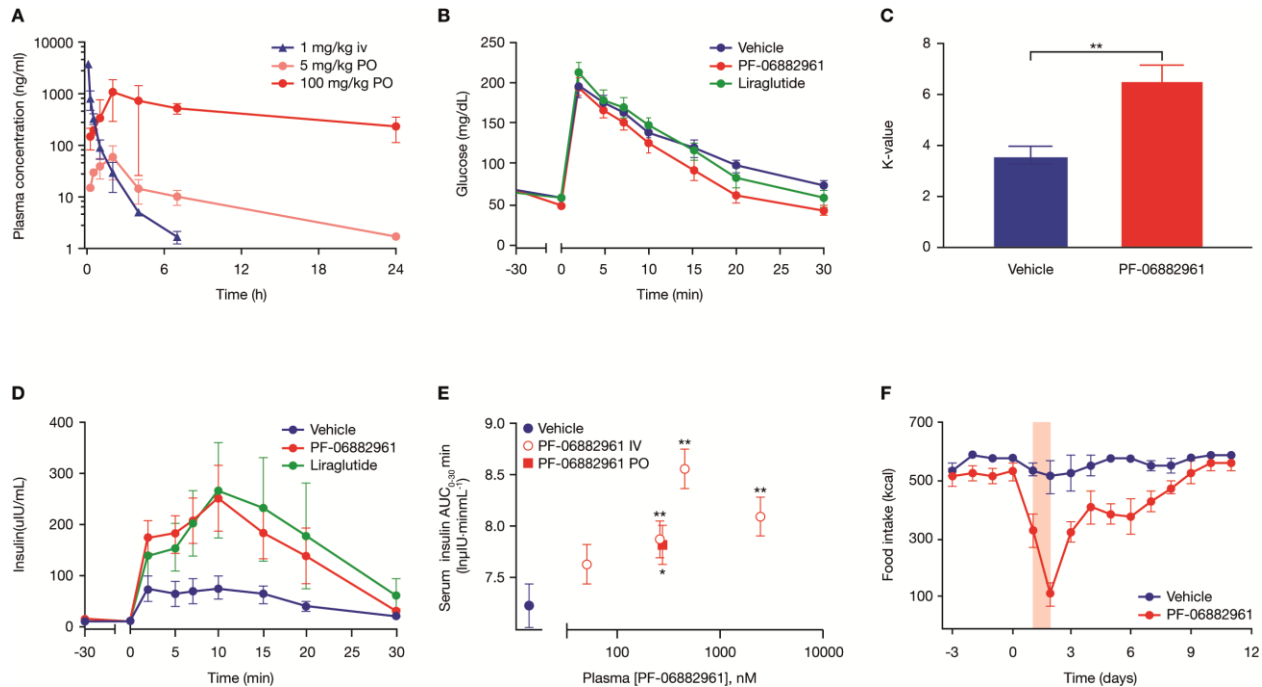

583

584

585

586

587

588

589

590

591

592

593

594

595

596

**Fig. 5. PF-06882961 potentiates glucose-stimulated insulin release and reduces food intake**

**in monkeys.** (A) PF-06882961 concentrations after IV or PO dosing in monkeys (n=2 each). (B–

E) PF-06882961 increased the rate of glucose disappearance and enhanced insulin secretion

during an IVGTT (250 mg/kg 50% dextrose) in monkeys (n=8 each). Serum glucose (B), k-value

(C), and serum insulin (D) during IVGTT when PF-06882961 was IV infused to 3.0  $\mu$ M (55 nM

unbound) serum levels; liraglutide was administered by subcutaneous injection to achieve 58 nM

(0.31 nM unbound) serum levels. (E) IV and PO administration of PF-06882961 potentiated

glucose-stimulated insulin release ( $AUC_{0-30 \text{ min}}$ ) in an exposure-proportional manner during an

IVGTT. (F) Food intake in monkeys treated with either vehicle or PF-06882961 (n=6 each). All

values are presented as mean  $\pm$  SEM. \*P<0.05 and \*\*P<0.01

AUC, area under the curve; IV, intravenous; IVGTT, intravenous glucose tolerance test;

PO, oral; SEM, standard error of the mean.



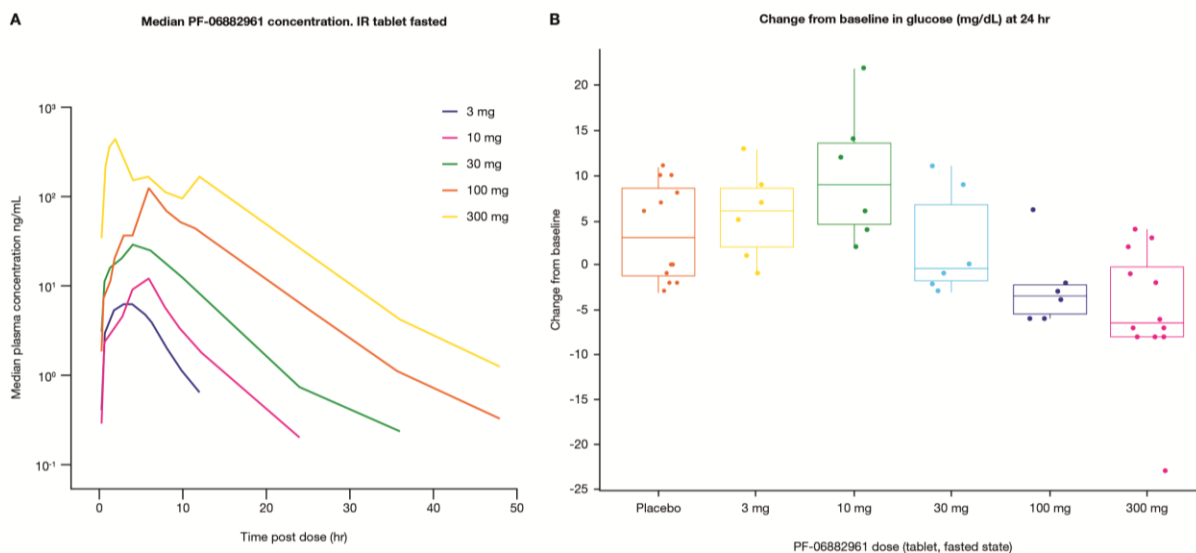

597

598 **Fig. 6. PF-06882961 lowers fasting serum glucose in healthy human volunteers. (A)** Median  
599 plasma PF-06882961 concentration–time profiles after single-dose oral administration of  
600 PF-06882961 (3–300 mg) to humans (n = 6/dose, except n = 12 in 300 mg group) in the fasted  
601 state. Plasma exposure increased in an approximately dose-proportional manner, as assessed by  
602 dose-normalized geometric mean C<sub>max</sub> and AUC<sub>inf</sub>, with a mean half-life (t<sub>1/2</sub>) ranging from 4.3 to  
603 6.1 hours (Table S11). The median time to maximal concentration (T<sub>max</sub>) values ranged from 2.0  
604 to 6.0 hours post-dose. **(B)** Fasting serum glucose was measured at pre-dose (baseline) and 24  
605 hours post-dose during each dosing period. The subject-level changes from baselines by  
606 treatment group for the tablet administrations of PF-06882961 and placebo in the fasted state are  
607 presented along with boxplots representing the medians and inter-quartile ranges. In exploratory  
608 post-hoc statistical analyses, the 300 mg dose showed a statistical difference from placebo (P <  
609 0.05, using paired t-tests unadjusted for multiple testing).

610 AUC, area under the curve; C<sub>max</sub>, maximum plasma concentration; CI, confidence interval; IR,  
611 immediate release; SD, standard deviation; T<sub>max</sub>, time of the first occurrence of C<sub>max</sub>.

612
